# Supplementary material for: Antimicrobial Resistance in Humans, Animals, Water and Household Environs in Rural Andean Peru: Exploring Dissemination Pathways through the One Health Lens
Source: MDPI journal article supplement (doi:10.3390/ijerph18094604), 2021-04-27
Supplement: s1 [file s1]

Table S1: Primers used for the detection of genes encoding the production of ESBL

| Gene                           |   | Sequence (5'→ 3')      | Size (bp) | Reference |
|--------------------------------|---|------------------------|-----------|-----------|
| <i>bla</i> <sub>TEM</sub>      | F | ATTCTTGAAGACGAAAGGGC   | 1150      | [40]      |
|                                | R | ACGCTCAGTGGAACGAAAAC   |           |           |
| <i>bla</i> <sub>SHV</sub>      | F | CACTCAAGGATGTATTGTG    | 885       | [41]      |
|                                | R | TTAGCGTTGCCAGTGCTCG    |           |           |
| <i>bla</i> <sub>OXA</sub>      | F | ACACAATACATATCAACTTCGC | 813       | [42]      |
|                                | R | AGTGTGTTTAGAATGGTGATC  |           |           |
| <i>bla</i> <sub>CTX-M-U</sub>  | F | CGATGTGCAGTACCAAGTAA   | 585       | [43]      |
|                                | R | TTAGTGACCAGAATCAGCGG   |           |           |
| <i>bla</i> <sub>CTX-M-2</sub>  | F | ATGATGACTCAGAGCATTCG   | 876       | [43]      |
|                                | R | TCAGAAACCGTGGGTAC      |           |           |
| <i>bla</i> <sub>CTX-M-3</sub>  | F | GTTACAATGTGTGAGAAGCAG  | 1017      | [43]      |
|                                | R | CCGTTTCCGCTATTACAAAC   |           |           |
| <i>bla</i> <sub>CTX-M-8</sub>  | F | TGATGAGACATCGCGTTAAG   | 873       | [43]      |
|                                | R | TAACCGTCGGTGACGATTTT   |           |           |
| <i>bla</i> <sub>CTX-M-9</sub>  | F | GTGACAAAGAGAGTGCAACGG  | 857       | [43]      |
|                                | R | ATGATTCTCGCCGCTGAAGCC  |           |           |
| <i>bla</i> <sub>CTX-M-10</sub> | F | CCGCGCTACACTTTGTGGC    | 944       | [43]      |
|                                | R | TTACAAACCGTTGGTGACG    |           |           |

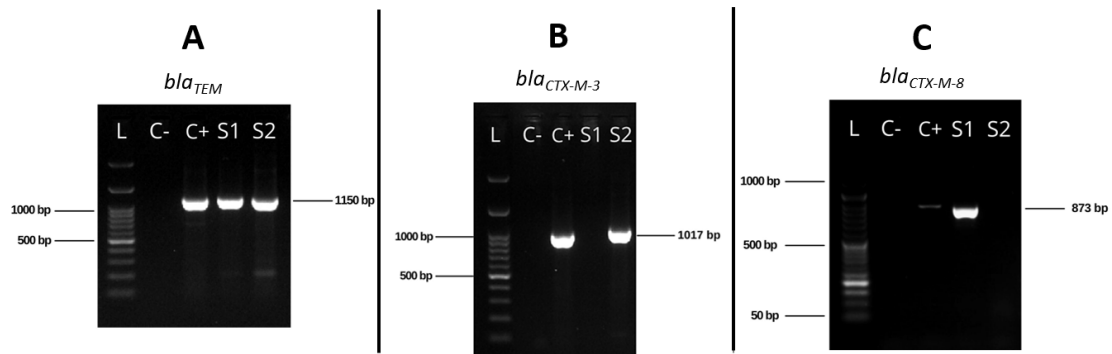

Figure S1: PCR amplification of  $\beta$ -lactamase genes harboring *bla*<sub>TEM</sub>, *bla*<sub>CTX-M-8</sub> and *bla*<sub>CTX-M-3</sub> genes in *Shigella* spp. (S1) isolate from a dog faecal sample and *E. coli* (S2) isolate from a water sample. L, 100 bp DNA ladder, C-, negative control, C+, positive control. A) *bla*<sub>TEM</sub> (1150 bp), B) *bla*<sub>CTX-M-3</sub> (1017 bp), C) *bla*<sub>CTX-M-8</sub> (800 bp) amplification products.
